# Supplementary material for: Brain Inositol Is a Novel Stimulator for Promoting Cryptococcus Penetration of the Blood-Brain Barrier
Source: PLoS Pathog. 2013 Apr 4;9(4):e1003247. doi: 10.1371/journal.ppat.1003247 (PMC3617100; doi:10.1371/journal.ppat.1003247)
Supplement: Table S1 — Microarray analysis of genes regulated by inositol. Wild type strain H99 was cultured in SD medium with or without 5 mM inositol for 24 hrs before RNAs were purified for Cryptococcus whole genome microarray analysis. (XLSX) [file ppat.1003247.s005.xlsx]

## Sheet: Sheet1
JEC21 ID	H99 ID	Change ratio (Log2)	with /without inositol for 24 hrs
CNI01750	CNAG_04394	5.04941	glycoside hydrolase family 79 protein [Laccaria bicolor S238N-H82] , beta-glucuronidase [Verticillium dahliae VdLs.17]
CNF03950	CNAG_06623	5.02816	myo-inositol oxygenase
CNF04890	CNAG_06530	2.44612	myo-inositol 2-dehydrogenase
CNI01540	CNAG_04374, CNAG_04394	1.86859	glycoside hydrolase family 79 protein [Laccaria bicolor S238N-H82] , beta-glucuronidase [Verticillium dahliae VdLs.17]
CNC00730	CNAG_03012	1.40756	unknown, small peptide
CNC00730	CNAG_03012	1.36499	unknown, small peptide
CNC00730	CNAG_03012	1.35524	unknown, small peptide
CNL03670	CNAG_05261	1.27474	unknown, Crypto specific
CNI00940	No hit	1.2744	unknown, 73 aa peptide
CNJ03330	CNAG_07840	1.27348	unknown, Crypto specific
CNG04220	CNAG_03143	1.2538	heat shock protein
CNM02480	CNAG_06247	1.2258	Glycosyl transferases group I
CNI00130	None	1.2246	polyadenylation_factor_64_kDa_subuni
CNK02130	CNAG_01873	1.18382	Unknown, no hit in animal or human
CNL05090	CNAG_00030	1.17242	fungal specific TF. C6 transcription factor [Aspergillus niger CBS 513.88]
CNM02200	CNAG_06220	1.16502	allergen
CNB00320	No hit	1.16084	unknown
CNG03010	CNAG_03277	1.1432	myo-inositol oxygenase
CNJ03390	CNAG_04919	1.12373	UNKNOWN
CNA01440	None	1.11013	UNKNOWN
CND05010	CNAG_01389	1.10109	unknown
CNF02910	CNAG_05683	1.09328	unknown
CNK01980	CNAG_01858	1.08805	unknown
CNL03860	None	1.07237	unknown
CNH03070	CNAG_05376	1.07172	unknown
CNF04200	CNAG_06599	1.06949	unknown
CND03860	CNAG_01265	1.06932	unknown
CNF00820	None	1.06854	unknown
CNB00970	None	1.06791	gag-pol polyprotein
CNB00880	CNAG_06715	1.06608	unknown
CNA07110	CNAG_00733	1.05929	unknown
CNA02920	CNAG_00309	1.05036	unknown
CNB03770	CNAG_03889	1.04172	unknown
CNK01160	CNAG_05245	1.04134	unknown
CNK02820	None	1.03591	unknown
CNK02430	None	1.03427	unknown
CNC00450	CNAG_07789	1.02443	unknown
CND00560	None	1.02236	unknown
CND06430	None	1.01293	unknown
CNM01010	None	1.00223	unknown
CNK01790	CNAG_02691	-1.0005	unknown
CNE04150	CNAG_02122	-1.00117	unknown
CNA00790	CNAG_00089	-1.00226	exosome_complex_exonuclease
CNA01800	CNAG_00191	-1.00256	unknown
'CNM00960'	None	-1.0034	unknown
'CNG02080'	CNAG_03375	-1.00477	succinyl-coa_ligase
'CNI00550'	CNAG_04502	-1.0052	unknown
'CNK00210'	CNAG_06906	-1.00592	unknown
'CNC02730'	CNAG_01773	-1.00656	unknown
'CNJ00140'	CNAG_07862	-1.00672	unknown
'CNB05450'	CNAG_04062	-1.00699	unknown
'CNA02520'	CNAG_00261	-1.00848	unknown
'CNK00710'	CNAG_02579	-1.00913	unknown
'CNF03770'	CNAG_06639	-1.01191	unknown
'CNM00920'	CNAG_06085	-1.01277	unknown
'CNK03180'	CNAG_01985	-1.01346	unknown
'CNA05970'	CNAG_00615	-1.01643	unknown
'CNK01520'	CNAG_02662	-1.01646	unknown
'CNM01810'	CNAG_06180	-1.0195	unknown
'CNC02200'	CNAG_01716	-1.02142	unknown
'CNI01680'	CNAG_04379	-1.02244	unknown
'CNE02270'	CNAG_02318	-1.02267	unknown
'CNC02360'	CNAG_01731	-1.02281	unknown
'CNM02000'	CNAG_06201	-1.02662	unknown
'CNJ00240'	CNAG_04582	-1.02715	unknown
'CNE03880'	CNAG_02148	-1.02926	unknown
'CNB02190'	CNAG_03721	-1.03009	26 s proteasome non -Atpase
'CNC01240'	CNAG_01611	-1.03085	unknown
'CNC00290'	CNAG_03060	-1.03129	multiple_drug_resistance_protein
'CNC04360'	CNAG_02819	-1.03312	unknown
'CNJ00600'	CNAG_04622	-1.03426	nitrosoguanidine_resistance_protein_sng1
'CNE02420'	CNAG_02304	-1.03435	unknown
'CNA04520'	CNAG_00471	-1.03441	unknown
'CND03140'	CNAG_01189	-1.03457	unknown
'CNC05050'	CNAG_02892	-1.03477	dolichyl-phosphate-mannose--glycolipid_alpha-mannosyltransferase-like_protein
'CNC03310'	CNAG_01846	-1.03639	unknown
'CNG04440'	CNAG_03117	-1.03649	unknown
'CNB02070'	CNAG_03710	-1.03828	unknown
'CNA04160'	CNAG_00433	-1.0394	unknown
'CNG03490'	CNAG_03225	-1.04146	malate dehydrogenase
'CNK01260'	CNAG_07544	-1.04234	unknown
'CNH00490'	CNAG_07874	-1.04263	sugar transporter
'CNM02370'	CNAG_06237	-1.0427	unknown
'CNI03350'	CNAG_04197	-1.04384	Yak1 homolog
'CNM00900'	CNAG_06081	-1.04421	unknown
'CNE02330'	CNAG_02313	-1.04474	unknown
'CNF03990'	CNAG_06620	-1.04636	unknown
'CNB01730'	CNAG_03674	-1.0466	oxoglutarate dehydrogenase
'CNA00840'	CNAG_00093	-1.04722	unknown
'CNM00790'	CNAG_07901	-1.04993	unknown
'CNC02700'	CNAG_01770	-1.05131	leucine_zipper-EF-hand_containing_transmembrane_protein_1-related
'CNM02300'	CNAG_06229	-1.05217	unknown
'CNJ03290'	CNAG_04906	-1.0543	26s prteasome regulatory
'CNC04990'	CNAG_02886	-1.05531	proteasome subunit
'CNH00600'	CNAG_05392	-1.06226	ROK1 related
'CNB01770'	CNAG_03678	-1.06445	unknown
'CNC06020'	CNAG_02994	-1.0673	unknown
'CNJ03380'	CNAG_07838	-1.07121	unknown
'CNJ00180'	CNAG_04577	-1.07175	oncoprotein nm23
'CNN01460'	CNAG_06421	-1.07324	acetolactate synthase
'CNM00180'	CNAG_06009	-1.07424	unknown
'CNB00600'	CNAG_06742	-1.07442	unknown
'CNJ01870'	CNAG_04757	-1.07485	unknown
'CNE02090'	CNAG_02338	-1.076	dna-binding_protein_hexbp_(hexamer-binding_protein)
'CNA04510'	CNAG_00470	-1.07635	developmental_protein_DG1118
'CNA07870'	CNAG_00810	-1.07704	unknown
'CNM01580'	CNAG_06156	-1.0776	unknown
'CNN00460'	CNAG_06316	-1.07902	|glycine_cleavage_system_h_protein
'CND01310'	CNAG_01002	-1.07934	unknown
'CNI02100'	CNAG_04340	-1.07937	unknown
'CNC02270'	CNAG_01723	-1.07974	unknown
'CNE04920'	CNAG_07649	-1.08087	unknown
'CNB04570'	CNAG_03968	-1.08428	polyA-binding protein
'NOT AVAILABLE'	CNAG_01821	-1.08623	unknown
'CNB04890'	CNAG_04005	-1.08751	negative_regulator_of_differentiation_1
'CNI03480'	CNAG_04209	-1.08818	unknown
'CNM01030'	CNAG_06096	-1.0894	unknown
'CNA01360'	CNAG_00148	-1.09163	unknown
'CNE05370'	CNAG_07305	-1.09207	unknown
'CNM01770'	CNAG_07908	-1.09501	unknown
'CNE04580'	CNAG_02079	-1.09516	unknown
'CNF00870'	CNAG_05886	-1.09673	MMS2
'CNL04850'	CNAG_05137	-1.09754	putative_KDEL_receptor
'CNK01330'	CNAG_07538	-1.09836	U18944_Hum1p-related
'CNG03300'	CNAG_03243	-1.09937	unknown
'CNJ03090'	CNAG_04879	-1.09976	Highly_similar_to_Glycogen_debranching_enzyme
'CNB02240'	CNAG_03726	-1.10057	unknown
'CNE04230'	CNAG_02114	-1.10166	unknown
'CNE01900'	CNAG_02360	-1.10283	unknown
'CNA08350'	CNAG_03096	-1.10428	unknown
'CND05490'	CNAG_01435	-1.10576	seryl-trna synthetase
'CNB02360'	CNAG_03739	-1.10669	ribosomal L10 protein
'CNG02290'	CNAG_03349	-1.10912	unknown
'CNL04610'	CNAG_05164	-1.1099	unknown
'CNG03830'	CNAG_03186	-1.11024	unknown
'CNA05170'	CNAG_00535	-1.1105	ribosomal protein
'CNC01600'	CNAG_01647	-1.11086	unknown
'CNN02260'	CNAG_06501	-1.11144	unknown
'CND05830'	CNAG_07005	-1.1117	unknown
'CNA05000'	CNAG_07365	-1.11198	unknown
'CNJ00510'	CNAG_04612	-1.11263	unknown
'CNN01210'	CNAG_06396	-1.11322	unknown
'CNA04100'	CNAG_00424	-1.11413	unknown
'CNA02040'	CNAG_07334	-1.11613	ferric reductase
'CNH02560'	CNAG_05615	-1.1163	syntaxin
'CNC05950'	CNAG_02986	-1.11689	nucleoside_diphosphate-sugar_hydrolase_of_the_MutT_(nudix)_family,_putative
'CND02900'	CNAG_01164	-1.11715	glucosamine--fructose-6-phosphate_aminotransferase
'CNB01060'	CNAG_03603	-1.11833	atp-dependent_rna_helicase
'CNH01630'	CNAG_05510	-1.11928	unknown
'CNA04990'	CNAG_00517	-1.12083	unknown
'CNJ01950'	CNAG_04765	-1.12169	probable_arp2/3_complex_21
'CNK01410'	CNAG_07530	-1.1221	unknown
'CNK00550'	CNAG_02562	-1.1223	unknown
'CNC04340'	CNAG_02817	-1.12396	Rab/GTPase
'CNH03240'	CNAG_05310	-1.12422	unknown
'CNA02490'	CNAG_00260	-1.12448	unknown
'CND05770'	CNAG_06806	-1.1261	unknown
'NOT AVAILABLE'	CNAG_07594	-1.12633	unknown
'CNC01680'	CNAG_01655	-1.1289	|dynamin-related_protein_dnm1
'CNB02260'	CNAG_03728	-1.13131	unknown
'CNA07620'	CNAG_00785	-1.13488	eukaryotic_initiation_fact
'CNI04420'	CNAG_04106	-1.1349	unknown
'CNA04310'	CNAG_00450	-1.13943	unknown
'CNA01500'	CNAG_00162	-1.14552	unknown
'CNA00710'	CNAG_00081	-1.14689	pre-mRNA_splicing_factor
'CNN02420'	CNAG_06521	-1.14998	quinate_permease
'CNF03740'	CNAG_06642	-1.15343	PI3K
'CNE04640'	CNAG_02072	-1.15366	unknown
'CNE02730'	CNAG_07641	-1.15493	MSTA protein
'CNC01990'	CNAG_01690	-1.15801	unknown
'CNA01560'	CNAG_07314	-1.15825	unknown
'CNA00560'	CNAG_00065	-1.15837	unknown
'CNF01520'	CNAG_05828	-1.16118	unknown
'CNN00050'	CNAG_06267	-1.16223	unknown
'CNB04620'	CNAG_03974	-1.1657	unknown
'CNG01250'	CNAG_03465	-1.16717	diphenol_oxidase
'CNA07920'	CNAG_00815	-1.16788	unknown
'CNB05340'	CNAG_04050	-1.16903	unknown
'CNK01540'	CNAG_02664	-1.1719	unknown
'NOT AVAILABLE'	CNAG_00047	-1.17196	unknown
'CNH02200'	CNAG_05573	-1.17227	unknown
'CNA01820'	CNAG_00193	-1.17267	transcription_factor_ScGAT
'CNJ00800'	CNAG_04640	-1.17446	LD21334p
'CNA04720'	CNAG_00493	-1.17612	unknown
'CNH00760'	CNAG_05408	-1.1785	unknown
'CNN01560'	CNAG_06432	-1.17982	unknown
'CNC01910'	CNAG_01680	-1.18162	methylcrotonoyl-Coenzyme_A_carboxylase
'CNM02320'	CNAG_06231	-1.18164	unknown
'CNB05480'	CNAG_04064	-1.1819	unknown
'NOT AVAILABLE'	CNAG_03295	-1.1821	unknown
'CNF04700'	CNAG_07657	-1.18565	unknown
'CNG04300'	CNAG_03134	-1.1878	unknown
'CNA00630'	CNAG_00073	-1.18988	unknown
'CNE04660'	CNAG_02070	-1.18994	unknown
'CNN01150'	CNAG_06388	-1.19023	unknown
'CNE01090'	CNAG_07630	-1.19531	unknown
'CNA03310'	CNAG_00372	-1.19578	unknown
'CNG00600'	CNAG_07745	-1.19929	mannitol-1-phosphate dehydrogenase
'CNH00540'	CNAG_05387	-1.20023	MSTA protein
'CNG00140'	CNAG_03591	-1.20211	secretory_pathway_gdp_dissociation_inhibitor
'CNA00530'	CNAG_00062	-1.20484	unknown
'CNI01690'	CNAG_04378	-1.20824	F6-related
'CNA00480'	CNAG_00058	-1.20873	T-complex_protein_1_epsilon_subunit
'CNN01810'	CNAG_07941	-1.20879	unknown
'CNF04620'	CNAG_06555	-1.21069	unknown
'CNF03560'	CNAG_06663	-1.2109	unknown
'CNL04080'	CNAG_05221	-1.21195	histone H2a
'CNE00620'	CNAG_02498	-1.21808	sni1_protein_(sro7_protein)
'CNM01950'	CNAG_06196	-1.21815	unknown
'CNB05560'	CNAG_04073	-1.21827	unknown
'CNA02570'	CNAG_00268	-1.22237	acetolactate_synthase_Ilv2
'CNC01700'	CNAG_01657	-1.22417	fumarate_hydratase
'CNG03790'	CNAG_03190	-1.22916	unknown
'CNH00130'	CNAG_07033	-1.22987	unknown
'CNG03990'	CNAG_03168	-1.23682	unknown
'CNL06780'	CNAG_04938	-1.23742	unknown
'CNM00800'	CNAG_07902	-1.23856	unknown
'CNJ00290'	CNAG_04587	-1.23899	unknown
'CNK00300'	CNAG_06898	-1.23907	unknown
'CNJ03160'	CNAG_04891	-1.23951	unknown
'CNA01240'	CNAG_00137	-1.24385	unknown
'CNG04140'	CNAG_03152	-1.24392	sorcin._[blood_fluke
'CNE00550'	CNAG_02507	-1.24843	unknown
'CNJ03340'	CNAG_04911	-1.24974	unknown
'CNA02940'	CNAG_00311	-1.2582	enoyl-CoA-hydratase
'CNH02950'	CNAG_05657	-1.25856	nadp-dependent_mannitol_dehydrogenase
'CNB04330'	CNAG_03946	-1.26037	galactokinase
'CNF00090'	CNAG_05976	-1.26048	unknown
'CNB05750'	CNAG_04096	-1.26058	unknown
'CNB01720'	CNAG_03673	-1.26066	serine/threonine_protein_p
'CNA00570'	CNAG_00066	-1.26114	membrane protein
'NOT AVAILABLE'	CNAG_04991	-1.26162	unknown
'CNI03590'	CNAG_04217	-1.26354	phosphoenolpyruvate_carboxykinase
'CNC02370'	CNAG_01732	-1.26498	nuclear_pore_protein-related
'CNK03040'	CNAG_01969	-1.26845	unknown
'CNB01420'	CNAG_03641	-1.26873	unknown
'CNF04050'	CNAG_06614	-1.27015	unknown
'CNB02770'	CNAG_03782	-1.27226	unknown
'CNA03180'	CNAG_00337	-1.27247	unknown
'CNB04740'	CNAG_03987	-1.27517	KIAA1038_protein
'CNB05410'	CNAG_07491	-1.27562	glutaredoxin
'CNM02100'	CNAG_07912	-1.27601	unknown
'CNA04400'	CNAG_00460	-1.28322	unknown
'CNE03320'	CNAG_02209	-1.28365	SIK1
'CNE04860'	CNAG_02049	-1.2961	unknown
'NOT AVAILABLE'	CNAG_03719	-1.29688	unknown
'CNH00090'	CNAG_05343	-1.29873	unknown
'CNB04770'	CNAG_03991	-1.30249	GPCR
'CNK01820'	CNAG_02694	-1.30982	unknown
'CNN01550'	CNAG_06431	-1.31161
'CNA00300'	CNAG_00040	-1.31311	lanosterol_14_alpha-demethylase|
'CNJ02730'	CNAG_04848	-1.32086	SRP0001LB
'CNM01150'	CNAG_06109	-1.32172	unknown
'CNE02710'	CNAG_07639	-1.32374	triacylglycerol_lipase
'CNB04370'	CNAG_03950	-1.32478	unknown
'CNB01800'	CNAG_03682	-1.32597	macrolide-binding_protein
'CNA07240'	CNAG_00745	-1.32684	CAP64_gene_product, nitrogen permease reactivator protein
'CNA00170'	CNAG_00024	-1.32829	unknown
'CNK01190'	CNAG_07551	-1.335	unknown
'CNC03810'	CNAG_02759	-1.33566	unknown
'CNF03970'	CNAG_06621	-1.33744	biotin_synthase
'CNN01680'	CNAG_06443	-1.33908	unknown
'CNA05040'	CNAG_00522	-1.33948	unknown
'NOT AVAILABLE'	CNAG_02501	-1.34151	unknown
'CNH01190'	CNAG_05457	-1.34216	unknown
'CNB00990'	CNAG_03596	-1.34405	2-oxoglutarate_dehydrogenase_complex_E2_component
'CNC02410'	CNAG_01737	-1.34531	c-4_methyl_sterol_oxidase
'CNL04840'	CNAG_05138	-1.34541	exo-beta-1,3-glucanase
'CNG01210'	CNAG_07735	-1.3534	unknown
'CNG00860'	CNAG_03507	-1.35344	mitochondrial_processing_peptidase_beta_subunit
'CNJ02650'	CNAG_04840	-1.35353	unknown
'CNA00980'	CNAG_00107	-1.35714	unknown
'CND05310'	CNAG_01419	-1.36165	unknown
'CNA04270'	CNAG_00445	-1.36203	HMG1
'CNA02890'	CNAG_00305	-1.364	unknown
'CNC02150'	CNAG_01709	-1.36728	eukaryotic_translation_ini
'CNE04600'	CNAG_02076	-1.36811	leukotriene_a-4_hydrolase
'CNC07160'	CNAG_01464	-1.36922	unknown
'CNE00200'	CNAG_02546	-1.37468	unknown
'CNF02610'	CNAG_05714	-1.37553	unknown
'CNA04610'	CNAG_07363	-1.37815	isocitrate_dehydrogenase
'CNG03500'	CNAG_03223	-1.38941	unknown
'CND00180'	CNAG_00879	-1.39407	glutamate_dehydrogenase
'CNA07060'	CNAG_00727	-1.39451	cation_transporter-like_pr
'CNJ02870'	CNAG_04857	-1.3967	unknown
'CNA07550'	CNAG_00777	-1.39723	unknown
'CNE04340'	CNAG_02102	-1.39841	unknown
'CNE04910'	CNAG_02044	-1.40034	unknown
'CNA04680'	CNAG_00486	-1.40091	Rik_protein
'CNA01850'	CNAG_07316	-1.40471	unknown
'CND04880'	CNAG_01375	-1.40576	unknown
'CNF04460'	CNAG_07659	-1.40806	unknown
'CNJ03040'	CNAG_04876	-1.40985	unknown
'NOT AVAILABLE'	CNAG_03002	-1.41069	unknown
'CNF04330'	CNAG_06585	-1.41234	unknown
'CNB02820'	CNAG_03788	-1.42076	unknown
'CNE00870'	CNAG_02473	-1.4215	unknown
'CNA00950'	CNAG_00104	-1.42466	mrna_export_factor_elf1
'CNJ00490'	CNAG_04609	-1.42881	unknown
'CNB00420'	CNAG_06759	-1.43214	dehydrogenase
'CND03290'	CNAG_07435	-1.43317	unknown
'CNM01690'	CNAG_06168	-1.43762	unknown
'CNE01560'	CNAG_02399	-1.44308	glutathione_reductase
'CNB04860'	CNAG_04002	-1.44493	|protein_hob3_(homolog_of_bin3)
'CNC01930'	CNAG_01682	-1.45495	unknown
'CNE00370'	CNAG_02529	-1.45541	unknown
'CNG01470'	CNAG_03439	-1.46149	unknown
'CNI03910'	CNAG_04253	-1.46186	unknown
'CNH00970'	CNAG_05431	-1.46638	transcription_factor_PacC-related
'CNB05520'	CNAG_04069	-1.46725	unknown
'CNE00610'	CNAG_02500	-1.46982	calnexin
'CNG02940'	None	-1.47144	glycine-rich_RNA_binding_protein-related
'CNM01190'	CNAG_06114	-1.47285	unknown
'CNC06440'	CNAG_01539	-1.48386	inositol_1-phosphate_synthase
'CNG03690'	CNAG_07716	-1.48447	unknown
'CNE03060'	CNAG_02234	-1.50036	unknown
'CNE03490'	CNAG_02188	-1.5022	unknown
'CNB02830'	CNAG_03789	-1.50286	unknown
'CNA04640'	CNAG_00482	-1.51029	RPN10-like_protein
'CNC01660'	CNAG_01653	-1.51374	unknown
'CNA04250'	CNAG_00442	-1.52226	cyclin-related
'CNK02310'	CNAG_01890	-1.52544	5-methyltetrahydropteroyltriglutamate--homocystei_methyltransferase
'CNH00140'	CNAG_05348	-1.5285	small_GTPase_CDC42
'CNE02440'	CNAG_02301	-1.53989	la_protein_homolog_(la_ribonucleoprotein)_(la_autoantigen_homolog)
'CNK03340'	CNAG_07615	-1.54039	vacuolar_membrane_ATPase_C
'CND01820'	CNAG_01052	-1.5549	unknown
'CNM00090'	CNAG_06000	-1.56912	glycoprotein
'CNB01230'	CNAG_03621	-1.56941	cyclophilin_A
'CNC02250'	CNAG_01721	-1.57122	porphobilinogen_deaminase
'CNG00600'	CNAG_07745	-1.58783	mannitol-1-phosphate_dehydrogenase
'CNC00760'	CNAG_01562	-1.59462	unknown
'CNL04470'	CNAG_05179	-1.59632	UBIQUINOL-CYTOCHROME_C_REDUCTASE_COMPLEX_CORE_PROTEIN_2_PRECURSOR
'CNN01720'	CNAG_06447	-1.60171	60s_ribosomal_protein_l17
'CNA03720'	CNAG_00383	-1.61407	calcium_transporting_ATPase
'CNM01380'	CNAG_06134	-1.62021	unknown
'CNG00770'	CNAG_03516	-1.62219	unknown
'CNI02790'	CNAG_04141	-1.6257	carboxypeptidase_s_precursor
'CNB05770'	CNAG_04098	-1.62598	PMR1
'CND00760'	CNAG_00936	-1.62829	unknown
'CNE02800'	CNAG_02266	-1.62863	unknown
'CNC05530'	CNAG_02943	-1.63829	unknown
'CNB05690'	CNAG_04090	-1.64587	bZip_transcription_factor
'CNA01520'	CNAG_00164	-1.64952	unknown
'CNK00680'	CNAG_02577	-1.65199	unknown
'CNB02990'	CNAG_03806	-1.66204	unknown
'CNF04760'	CNAG_06541	-1.68211	unknown
'CNE02570'	CNAG_02288	-1.69055	succinate/fumarate_mitochondrial_transporter
'CNG00300'	CNAG_03577	-1.6926	M26506_L10e_protein
'CNJ00950'	CNAG_04659	-1.69454	pyruvate_decarboxylase
'CNA07670'	CNAG_00791	-1.69659	unknown
'CNB00100'	CNAG_06791	-1.72892	unknown
'CNE04940'	CNAG_02041	-1.73744	unknown
'CNA01050'	CNAG_00115	-1.73852	sorbitol_dehydrogenase
'CNA03160'	CNAG_00334	-1.74182	heat_shock_protein_sks2
'CNA00690'	CNAG_00079	-1.74483	unknown
'CNN01000'	CNAG_06372	-1.74627	unknown
'CNB01670'	CNAG_03668	-1.74762	unknown
'CNA00850'	CNAG_00094	-1.78151	unknown
'CNF04450'	CNAG_07660	-1.8125	pyruvate_dehydrogenase_e1_component_alpha_subunit
'CNN00330'	CNAG_06297	-1.81392	unknown
'CNC02480'	CNAG_01745	-1.8186	sn-glycerol-3-phosphate_dehydrogenase_NAD+
'CND00910'	CNAG_00961	-1.83537	unknown
'CNA04340'	CNAG_00453	-1.83788	unknown
'CNN01470'	CNAG_06422	-1.86293	unknown
'CNJ01670'	CNAG_04737	-1.87174	unknown
'CNA02870'	CNAG_00301	-1.88132	unknown
'CNM02060'	CNAG_06207	-1.88664	unknown
'CNF01000'	CNAG_05872	-1.91714	unknown
'CNM01080'	CNAG_06101	-1.91952	adp,atp_carrier_protein_(adp/atp_translocase)
'CNG02940'	None	-1.92759	glycine-rich_RNA_binding_protein
'CNA05030'	CNAG_00521	-1.95458	unknown
'CNM01520'	CNAG_06150	-1.96089	unknown
'CNB04310'	CNAG_03944	-2.00183	unknown
'CNB03800'	CNAG_03892	-2.01121	unknown
'CNK03430'	CNAG_02008	-2.0161	unknown
'CNK00060'	CNAG_06924	-2.07587	unknown
'CNF03900'	CNAG_06628	-2.10832	|aldehyde_dehydrogenase
'CNF00630'	CNAG_05909	-2.13814	unknown
'CNA04370'	CNAG_00457	-2.14209	glutamine_synthetase
'CNB05110'	CNAG_04028	-2.17704	RNA-binding_protein_3-related
'CNB05110'	CNAG_04028	-2.23176	RNA-binding_protein_3-related
'CNA00470'	CNAG_00057	-2.32794	fructose-1,6-bisphosphatase
'CNA01180'	CNAG_00130	-2.35331	serine/threonine-protein_kinase
'CNH03280'	CNAG_05303	-2.39969	isocitrate_lyase
'CNB05660'	CNAG_04085	-2.41336	unknown
'CNH00910'	CNAG_05424	-2.46669	unknown
'CNH00910'	CNAG_05424	-2.49792	unknown
